# Supplementary material for: Controllable chiral memory in an anion tetrahedral cage
Source: Royal Society of Chemistry journal article supplement (doi:10.1039/d3qi01336g), 2023-01-01
Supplement: d3qi01336g1.pdf [file d3qi01336g1.pdf]

*Electronic Supplementary Information (ESI)*

## **Controllable chiral memory in an anion tetrahedral cage**

Wenyao Zhang,<sup>a,c,#</sup> Jie Zhao,<sup>a,#</sup> Dong Yang,<sup>a,\*</sup> Boyang Li,<sup>a</sup> Yang Feng,<sup>a</sup> Yue Wang,<sup>a</sup> Xiaoyan Zheng,<sup>b</sup>  
Xiao-Juan Yang<sup>b</sup> and Biao Wu<sup>a,b,\*</sup>

<sup>a</sup>Key Laboratory of Synthetic and Natural Functional Molecule of the Ministry of Education, College of Chemistry and Materials Science, Northwest University, Xi'an 710069, China. E-mail: yangdong@nwu.edu.cn. <sup>b</sup>Key Laboratory of Medicinal Molecule Science and Pharmaceutics Engineering, Ministry of Industry and Information Technology, School of Chemistry and Chemical Engineering, Beijing Institute of Technology, Beijing 100081, China. E-mail: wubiao@bit.edu.cn. <sup>c</sup>Key Laboratory of Magnetic Molecules and Magnetic Information Materials of Ministry of Education, School of Chemistry and Materials Science, Shanxi Normal University, TaiYuan 030031, China.

### **Table of Contents**

|                                                                        |    |
|------------------------------------------------------------------------|----|
| S1. General considerations.....                                        | 2  |
| S2. <sup>1</sup> H and 2D NMR spectra.....                             | 2  |
| S3. Circular dichroism (CD) characterization of chiral induction ..... | 9  |
| S4. Calculations of chiral induction and memory.....                   | 11 |
| S5. Binding constant.....                                              | 15 |
| S6. High-resolution ESI-MS spectra.....                                | 18 |
| S7. Energy calculations.....                                           | 20 |
| S8. X-ray crystallography.....                                         | 21 |
| S9. References.....                                                    | 24 |

## S1. General considerations

The *o*-nitrophenylisocyanate and *p*-nitrophenylisocyanate were purchased from Alfa Aesar. All solvents and other reagents were of reagent grade quality.  $^1\text{H}$  NMR spectra were obtained by using Bruker Avance III-400 MHz and JNM-ECZ400S spectrometers unless noted otherwise.  $^1\text{H}$  chemical shifts were based on the residual solvent peaks as the internal standard (1.94 ppm for  $\text{CD}_3\text{CN}$ ). All the ESI-MS measurements were carried out using a Bruker Daltonics micrOTOF-Q II mass spectrometer. Circular Dichroism (CD) spectra were recorded on a J-1500 spectropolarimeter (Jasco, Japan), using a 1 mm quartz cuvette. UV/vis spectra were done on Agilent Cray-100 spectrometer. Cage **1** and trifluoromethanesulfonate salts of enantiopure R/S- $\alpha$ -methylcholine ( $\text{G}^{1\text{S/R}}$ ), and R/S- $\beta$ -methylcholine ( $\text{G}^{2\text{S/R}}$ )<sup>2</sup> were synthesized according to our previous work.

## S2. $^1\text{H}$ and 2D NMR spectra

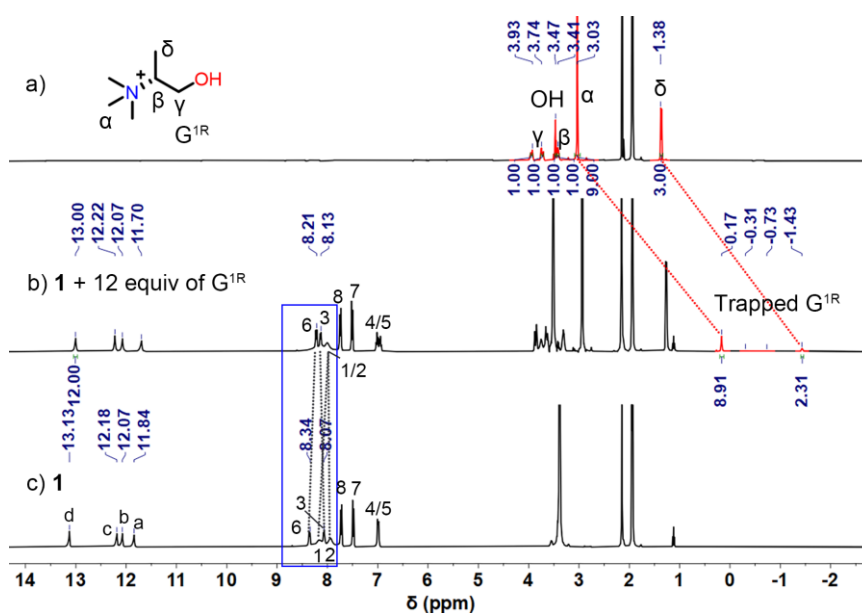

**Fig. S1**  $^1\text{H}$  NMR spectra (400 MHz,  $\text{CD}_3\text{CN}$ , 298 K, 0.5 mM) of a)  $\text{G}^{1\text{R}}$ , b) **1** with 12 equiv of  $\text{G}^{1\text{R}}$ , and c) **1** (changes of the chemical shifts of H1, H2, H3 and H6 are indicated by blue rectangle, and the signals for trapped  $\text{G}^{1\text{R}}$  are shown in red).

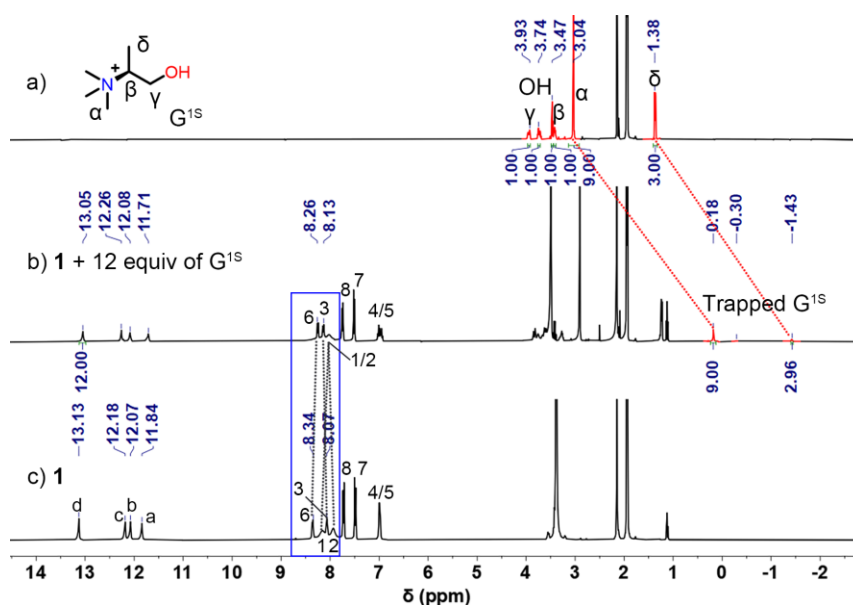

**Fig. S2** <sup>1</sup>H NMR spectra (400 MHz, CD<sub>3</sub>CN, 298 K, 0.5 mM) of a) G<sup>1S</sup>, b) **1** with 12 equiv of G<sup>1S</sup>, and c) **1** (changes of the chemical shifts of H1, H2, H3 and H6 are indicated by blue rectangle, the signals for trapped G<sup>1S</sup> are shown in red).

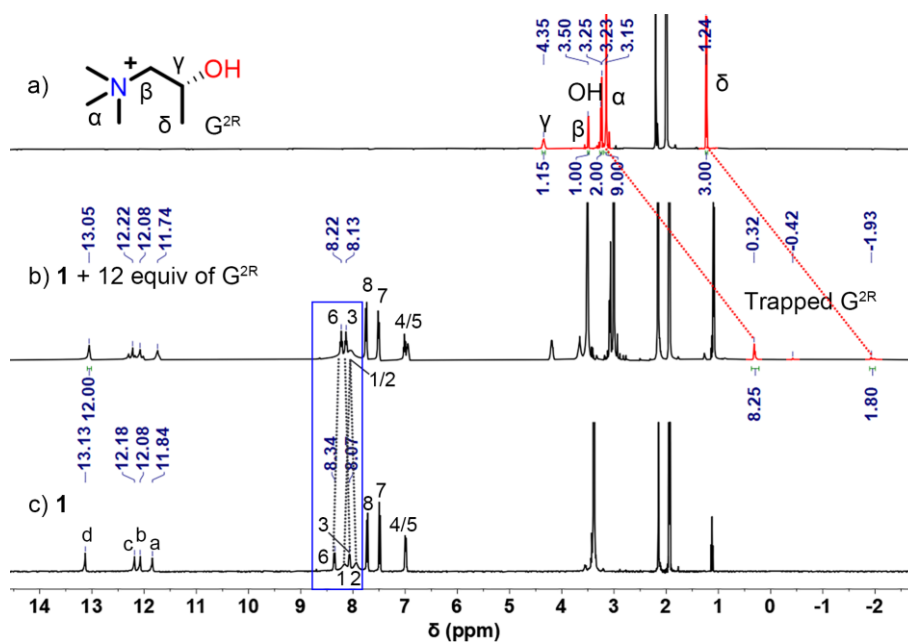

**Fig. S3** <sup>1</sup>H NMR spectra (400 MHz, CD<sub>3</sub>CN, 298 K, 0.5 mM) of a) G<sup>2R</sup>, b) **1** with 12 equiv of G<sup>2R</sup>, and c) **1** (changes of the chemical shifts of H1, H2, H3 and H6 are indicated by blue rectangle, the signals for trapped G<sup>2R</sup> are shown in red).

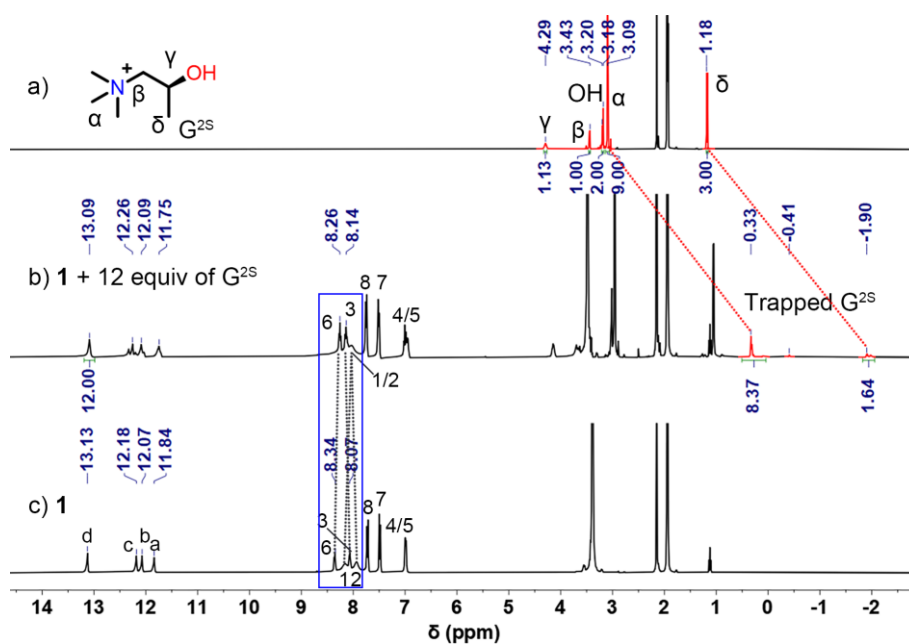

**Fig. S4**  $^1\text{H}$  NMR spectra (400 MHz,  $\text{CD}_3\text{CN}$ , 298 K, 0.5 mM) of a)  $\text{G}^{2\text{S}}$ , b) **1** with 12 equiv of  $\text{G}^{2\text{S}}$ , and c) **1** (changes of the chemical shifts of H1, H2, H3 and H6 are indicated by blue rectangle, the signals for trapped  $\text{G}^{2\text{S}}$  are shown in red).

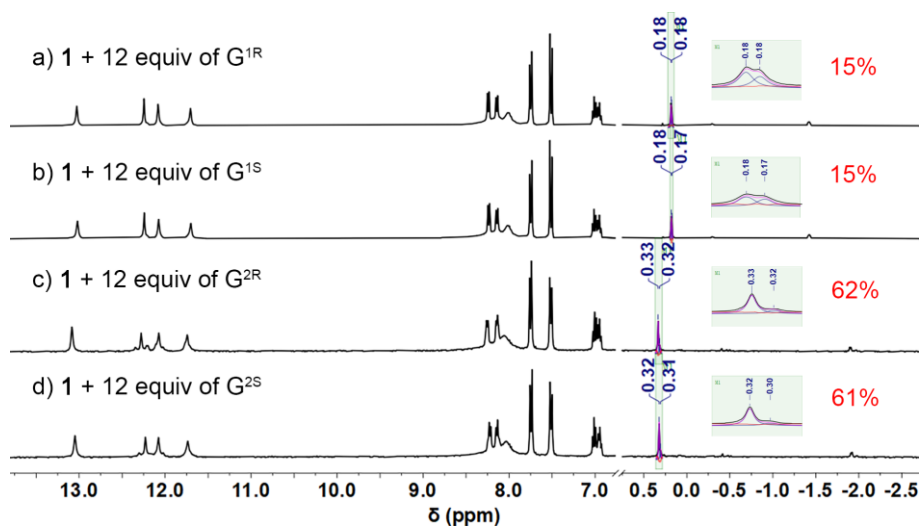

**Fig. S5**  $^1\text{H}$  NMR spectra (400 MHz,  $\text{CD}_3\text{CN}$ , 298 K, 0.5 mM) of a) **1** with 12 equiv of  $\text{G}^{1\text{R}}$ , b) **1** with 12 equiv of  $\text{G}^{1\text{S}}$ , c) **1** with 12 equiv of  $\text{G}^{2\text{R}}$  and d) **1** with 12 equiv of  $\text{G}^{2\text{S}}$ , the *de* values were calculated from the integration ratio of the signals of trapped guest.

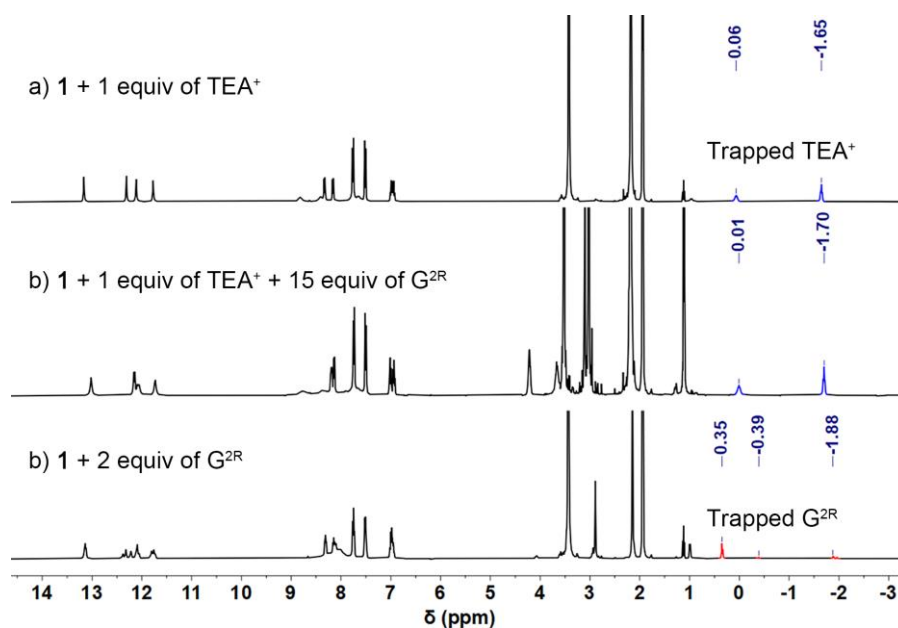

**Fig. S6**  $^1\text{H}$  NMR spectra (400 MHz,  $\text{CD}_3\text{CN}$ , 298 K, 500  $\mu\text{M}$ ) of a) **1** with 1 equiv of  $\text{TEA}^+$ , b) **1** with 1 equiv of  $\text{TEA}^+$  and 15 equiv of  $\text{G}^{2\text{R}}$ , c) **1** with 2 equiv of  $\text{G}^{2\text{R}}$  (the signals for trapped  $\text{TEA}^+$  are shown in blue,  $\text{G}^{2\text{R}}$  in red).

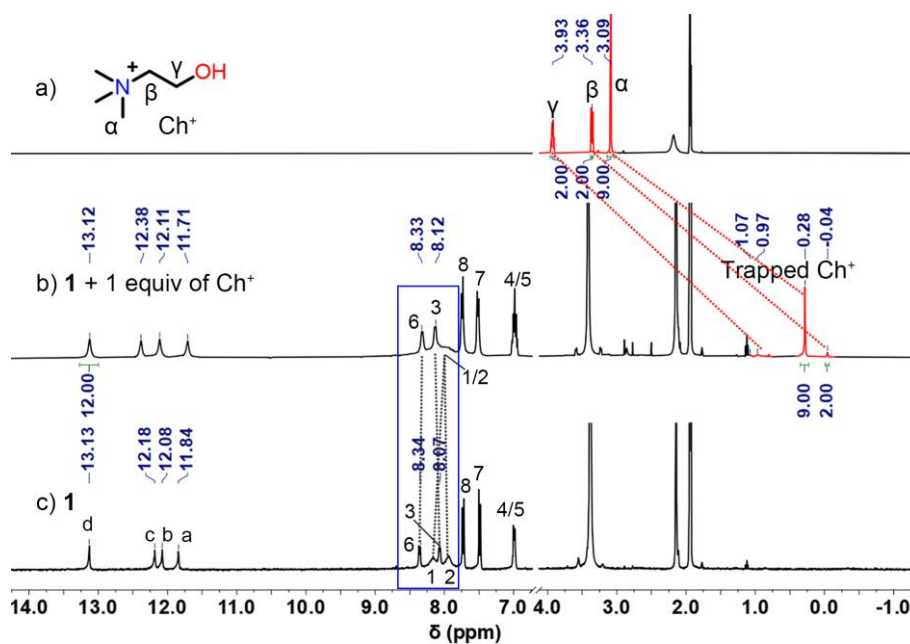

**Fig. S7**  $^1\text{H}$  NMR spectra (400 MHz,  $\text{CD}_3\text{CN}$ , 298 K, 0.5 mM) of a)  $\text{Ch}^+$ , b) **1** with 1 equiv of  $\text{Ch}^+$ , and c) **1** (changes of the chemical shifts of H1, H2, H3 and H6 are indicated by blue rectangle, the signals for trapped  $\text{Ch}^+$  are shown in red).

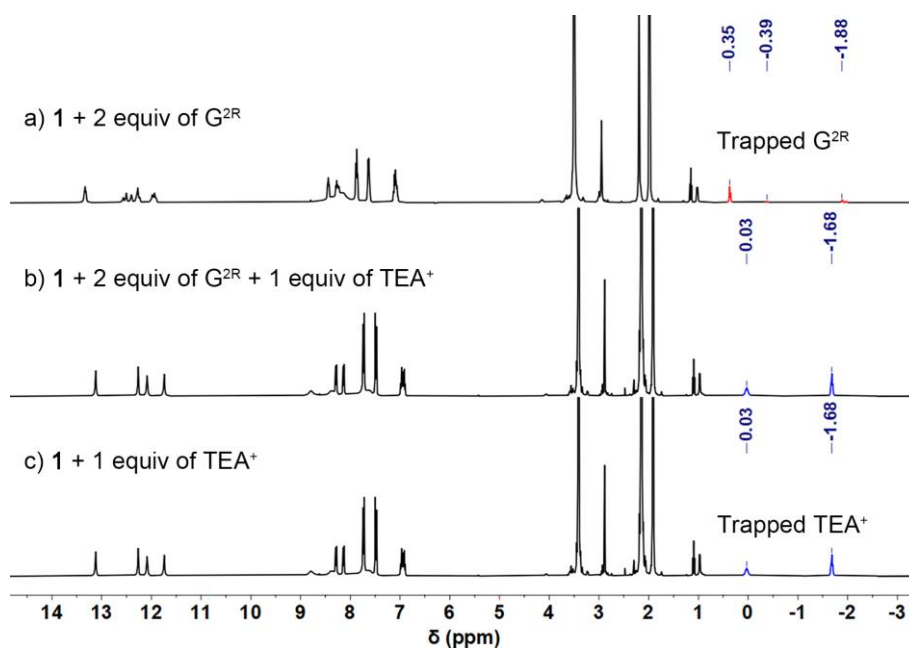

**Fig. S8** <sup>1</sup>H NMR spectra (400 MHz, CD<sub>3</sub>CN, 298 K, 0.5 mM) of a) **1** with 2 equiv of G<sup>2R</sup>, b) **1** with 2 equiv of G<sup>2R</sup> and 1 equiv of TEA<sup>+</sup>, c) **1** with 1 equiv of TEA<sup>+</sup> (the signals for trapped TEA<sup>+</sup> are shown in blue, and those for G<sup>2R</sup> are in red).

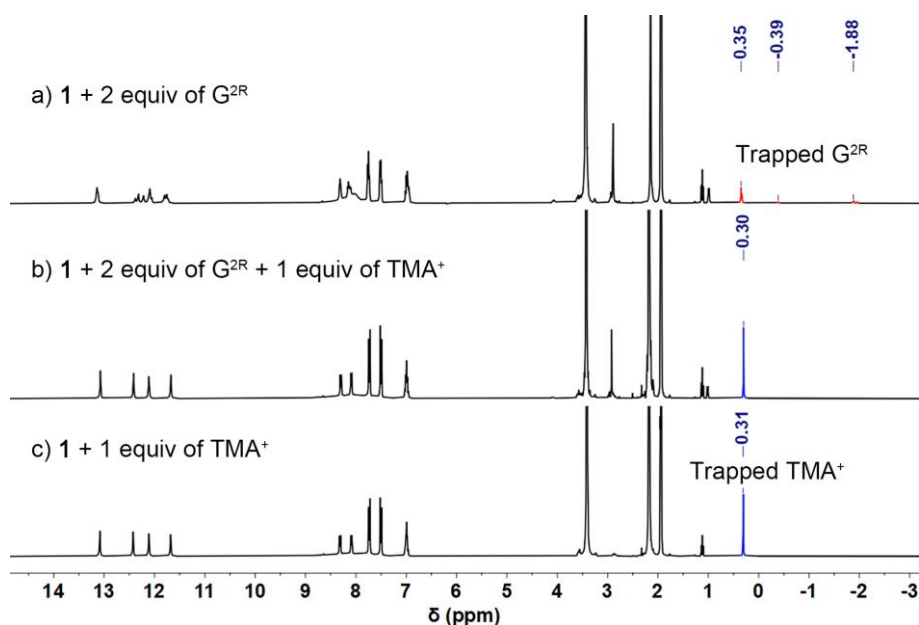

**Fig. S9** <sup>1</sup>H NMR spectra (400 MHz, CD<sub>3</sub>CN, 298 K, 0.5 mM) of a) **1** with 2 equiv of G<sup>2R</sup>, b) **1** with 2 equiv of G<sup>2R</sup> and 1 equiv of TMA<sup>+</sup>, c) **1** with 1 equiv of TMA<sup>+</sup> (the signals for trapped TMA<sup>+</sup> are shown in blue, and those for G<sup>2R</sup> are in red).

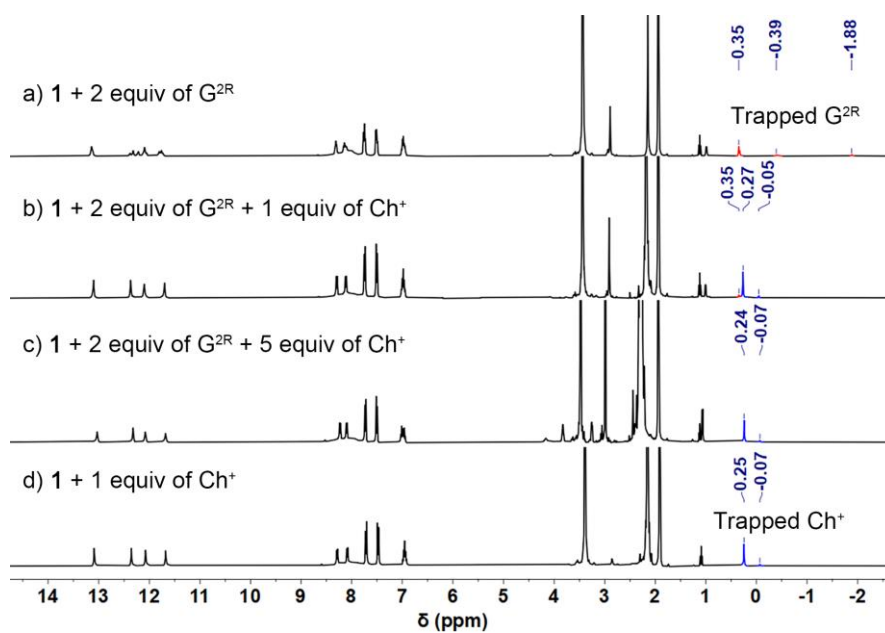

**Fig. S10**  $^1\text{H}$  NMR spectra (400 MHz,  $\text{CD}_3\text{CN}$ , 298 K, 0.5 mM) of a) **1** with 2 equiv of  $\text{G}^{2\text{R}}$ , b) **1** with 2 equiv of  $\text{G}^{2\text{R}}$  and 1 equiv of  $\text{Ch}^+$  (around 90 % of  $\text{G}^{2\text{R}}$  were replaced by 1 equiv of  $\text{Ch}^+$ ), c) **1** with 2 equiv of  $\text{G}^{2\text{R}}$  and 5 equiv of  $\text{Ch}^+$ , d) **1** with 1 equiv of  $\text{Ch}^+$  (the signals for trapped  $\text{Ch}^+$  are shown in blue).

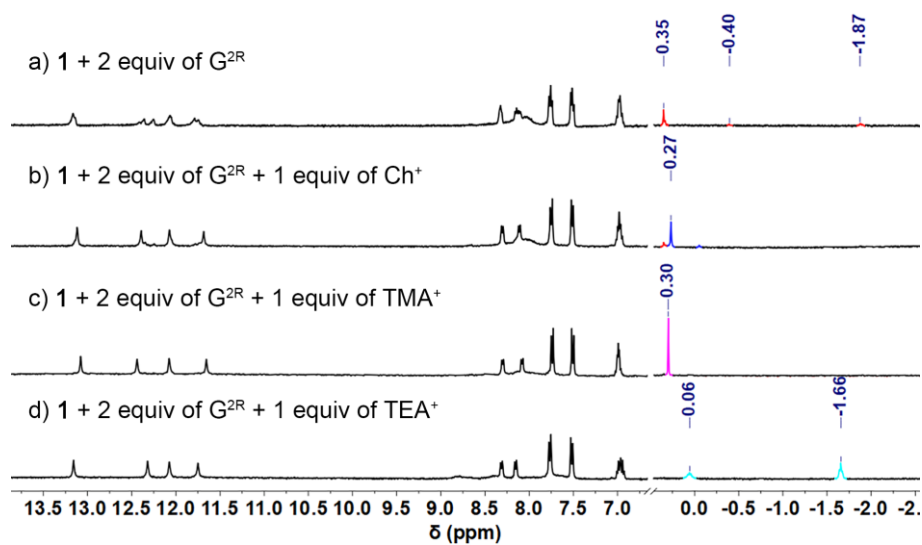

**Fig. S11**  $^1\text{H}$  NMR spectra (400 MHz,  $\text{CD}_3\text{CN}$ , 298 K, 50  $\mu\text{M}$ ) of a) **1** with 2 equiv of  $\text{G}^{2\text{R}}$ , b) **1** with 2 equiv of  $\text{G}^{2\text{R}}$  and 1 equiv of  $\text{Ch}^+$ , c) **1** with 2 equiv of  $\text{G}^{2\text{R}}$  and 1 equiv of  $\text{TMA}^+$ , d) **1** with 2 equiv of  $\text{G}^{2\text{R}}$  and 1 equiv of  $\text{TEA}^+$ .

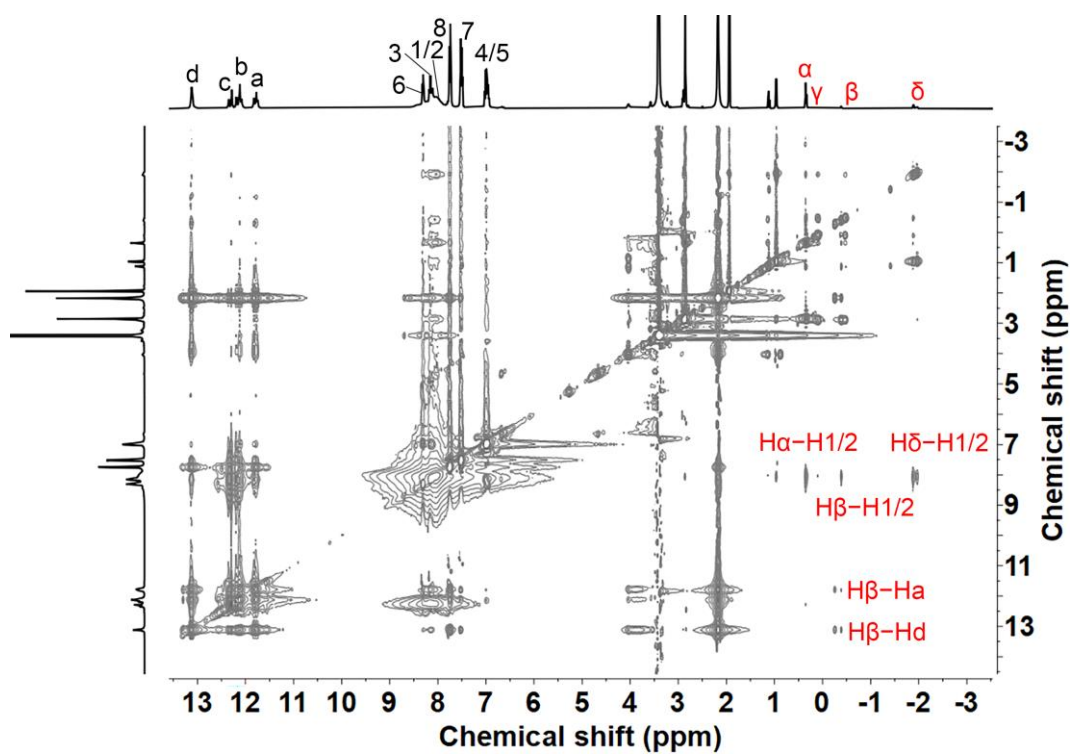

Fig. S12  $^1\text{H}$ - $^1\text{H}$  NOESY spectrum (400 MHz,  $\text{CD}_3\text{CN}$ , 298 K) of **1** with 2 equiv of  $\text{G}^{2\text{R}}$ .

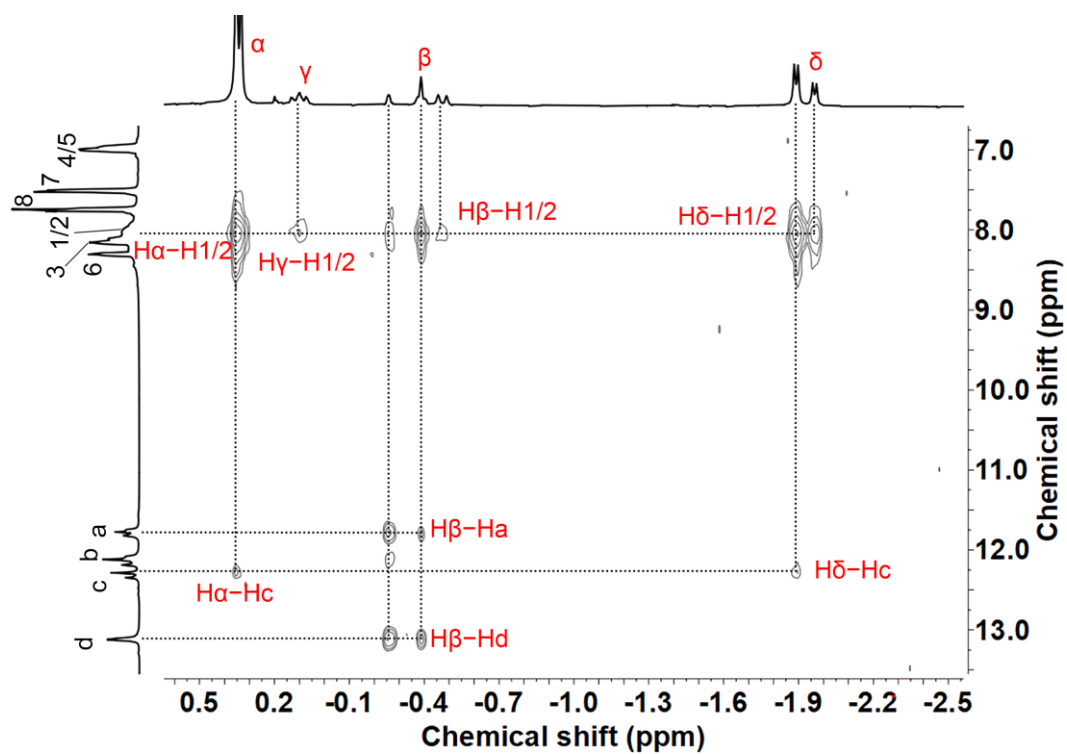

Fig. S13 Partial  $^1\text{H}$ - $^1\text{H}$  NOESY spectrum (400 MHz,  $\text{CD}_3\text{CN}$ , 298 K) of **1** with 2 equiv of  $\text{G}^{2\text{R}}$ .



### S3. Circular dichroism (CD) characterization of chiral induction

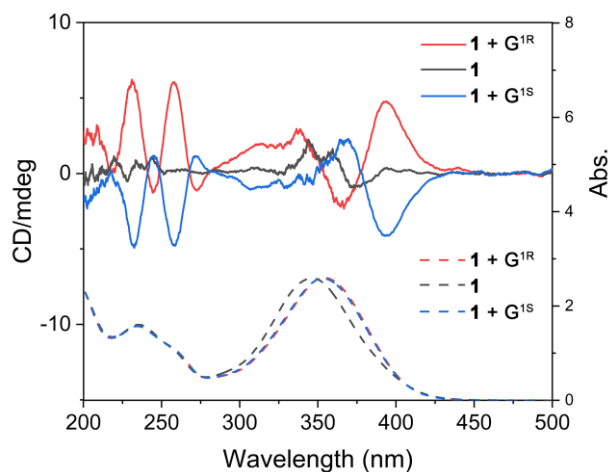

**Fig. S14** CD and UV-vis spectra of **1** (50 μM) before and after addition of 12 equiv of enantiomers of  $G^{1R/1S}$ .

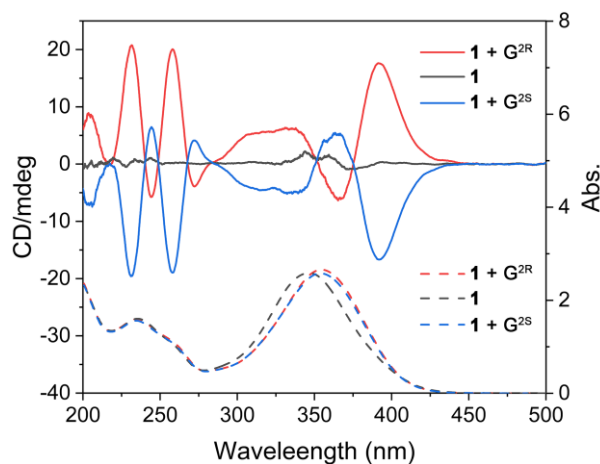

**Fig. S15** CD and UV-vis spectra of **1** (50 μM) before and after addition of 12 equiv of enantiomers of  $G^{2R/2S}$ .

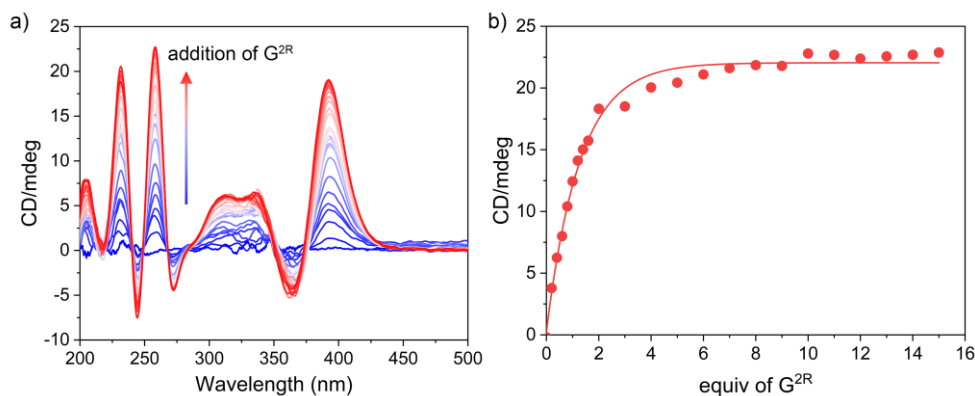

**Fig. S16** a) CD spectra of **1** (50 μM, CH<sub>3</sub>CN) with addition of different equiv of  $G^{2R}$  (from 0 to 15 equiv), b) CD intensity of **1** (50 μM, CH<sub>3</sub>CN) with addition of different equiv of  $G^{2R}$  at  $\lambda = 258$  nm.

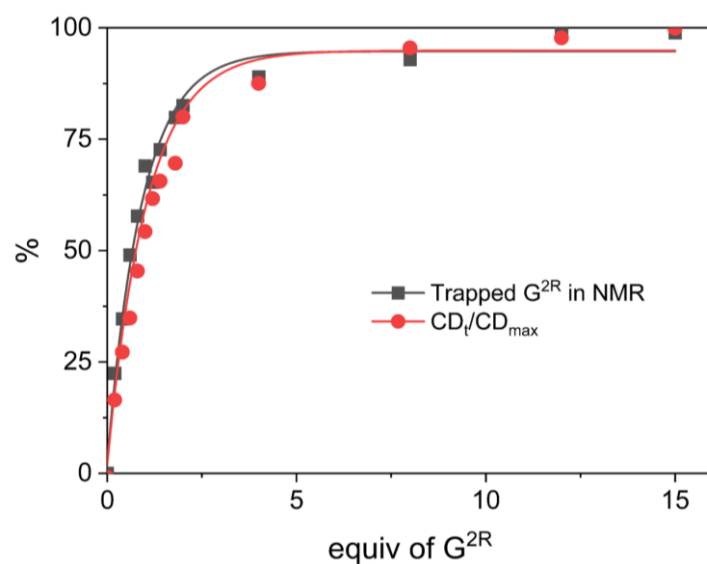

**Fig. S17** Plots of the integral areas of trapped  $G^{2R}$  in NMR (0.5 mM,  $CD_3CN$ ) and CD intensity at  $\lambda = 258$  nm (50  $\mu M$ ,  $CH_3CN$ ) versus the equiv of  $G^{2R}$ .

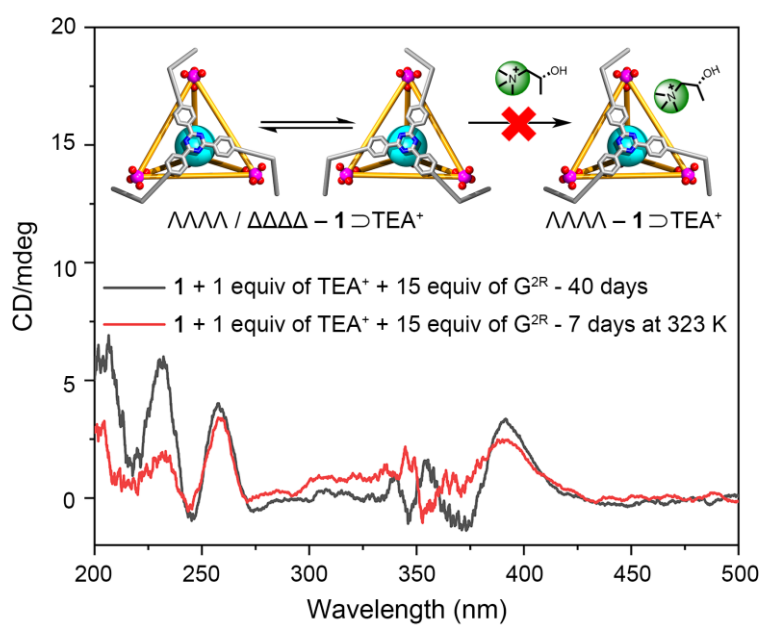

**Fig. S18** CD spectra of cage  $1 \supset TEA^+$  (50  $\mu M$ ) before and after addition of 15 equiv  $G^{2R}$  after equilibrated for 40 days or heated at 323 K for 7 days.

## S4. Calculations of chiral induction and memory

The calculations of rate constants, which were dependent on the first-order kinetic model<sup>3-5</sup>, are based on the equations:

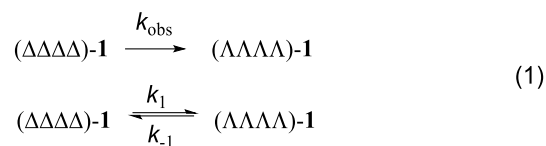

$$\ln(\text{CD}_t/\text{CD}_0) = -2k_1t \quad (2)$$

the  $k_1$  ( $\text{s}^{-1}$ ) is the rate constant for racemization, and the half-life time ( $t_{1/2}$ ) was obtained from equation (3):

$$t_{1/2} = \ln 2 / 2k_1 = 0.693 / 2k_1 \quad (3)$$

The activation enthalpy ( $\Delta H^\ddagger$ ), entropy ( $\Delta S^\ddagger$ ) and Gibbs free energy ( $\Delta G^\ddagger$ ) were obtained from the Eyring equation:

$$\ln(k_1 / T) = \Delta S^\ddagger / R - \ln(h / k_B) - \Delta H^\ddagger / (RT) \quad (4)$$

in which  $h$  is the Planck's constant,  $k_B$  is the Boltzmann constant,  $R$  ( $8.314 \text{ J K}^{-1} \text{ mol}^{-1}$ ) is the gas constant,  $T$  (K) is the absolute temperature.

The activation Gibbs free energy ( $\Delta G^\ddagger$ ) were obtained from  $\Delta H^\ddagger$  and  $\Delta S^\ddagger$ .

$$\Delta G^\ddagger = \Delta H^\ddagger - T\Delta S^\ddagger$$

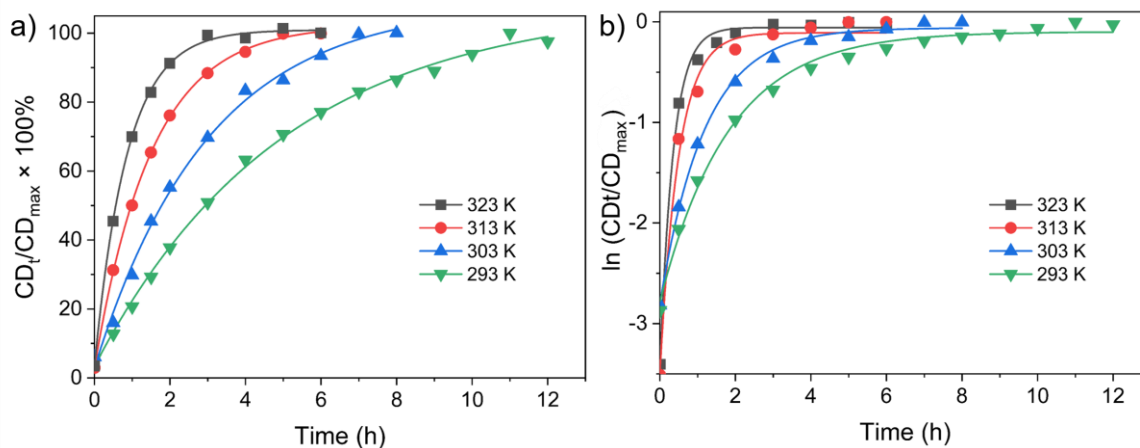

**Fig. S19** a) CD signal changes and b) plot of  $\ln(\text{CD}_t/\text{CD}_{\text{max}})$  of **1** with 12 equiv of  $\text{G}^{2\text{R}}$  at 258 nm against time at different temperatures.

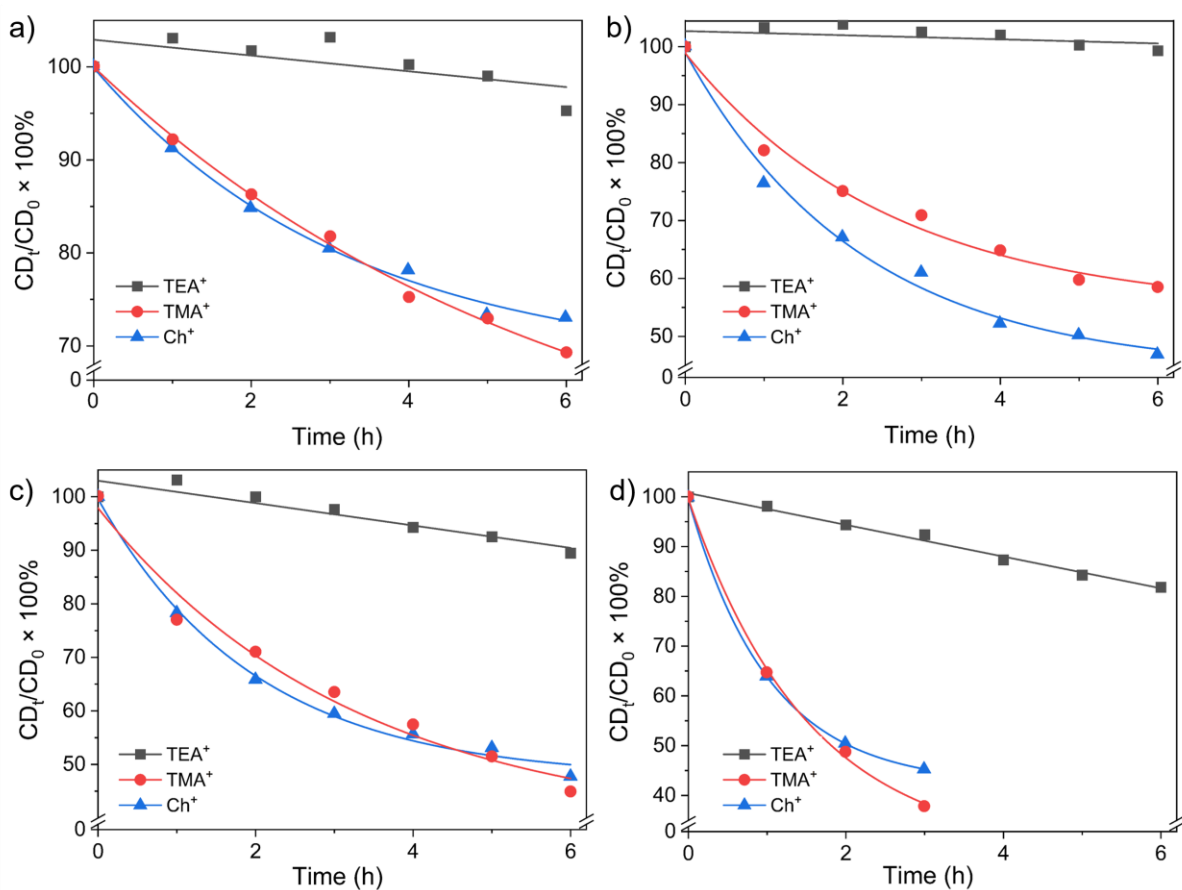

**Fig. S20** CD signal changes of **1** with 2 equiv of  $G^{2R}$  at 258 nm against time by the addition of 1 equiv of  $TEA^+$ ,  $TMA^+$  and  $Ch^+$  at a) 283 K, b) 293 K, c) 303 K, and d) 313 K.

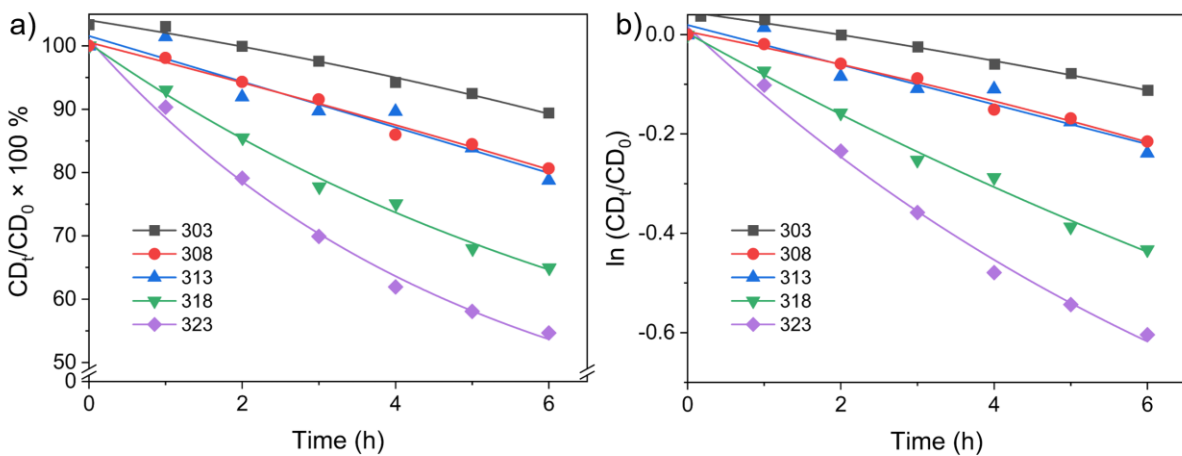

**Fig. S21** a) CD signal changes and b) plot of  $\ln(CD_t/CD_0)$  of **1** with 2 equiv of  $G^{2R}$  at 258 nm against time by the addition of 1 equiv of  $TEA^+$  at different temperatures.

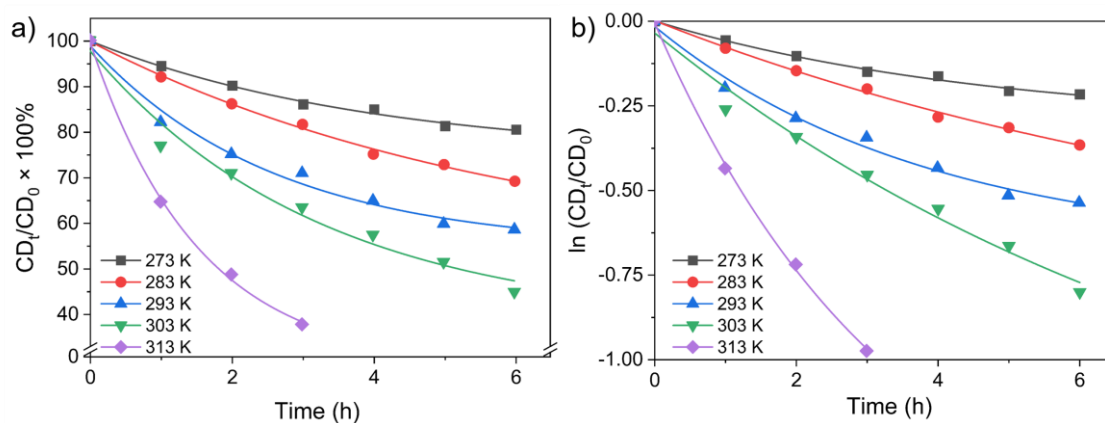

**Fig. S22** a) CD signal changes and b) plot of  $\ln(CD_t/CD_0)$  of **1** with 2 equiv of  $G^{2R}$  at 258 nm against time by the addition of 1 equiv of  $TMA^+$  at different temperatures.

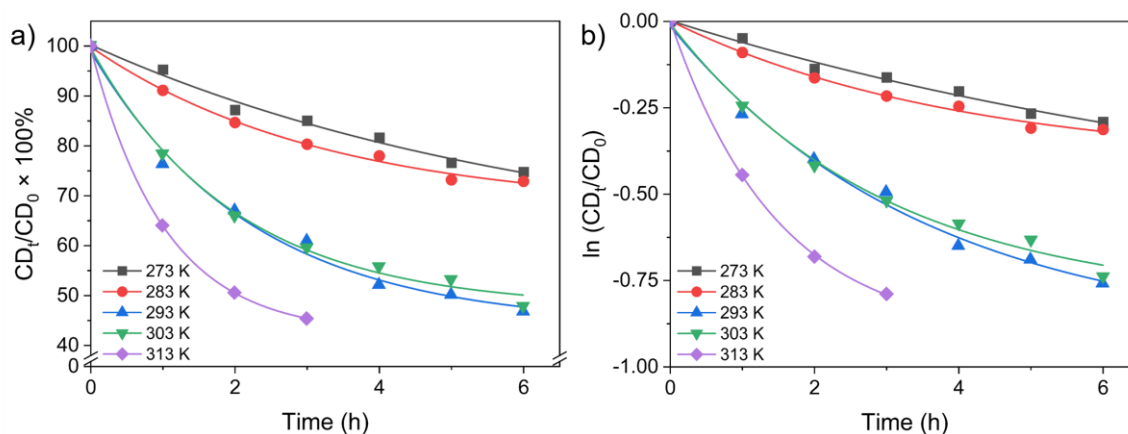

**Fig. S23** a) CD signal changes and b) plot of  $\ln(CD_t/CD_0)$  of **1** with 2 equiv of  $G^{2R}$  at 258 nm against time by the addition of 1 equiv of  $Ch^+$  at different temperatures.

**Table S1** Rate constant  $k_1$  of chiral induction by 12 equiv of  $G^{2R}$  at different temperatures.

| $k_1$ ( $s^{-1}$ ) | 293 K                            | 303 K                            | 313 K                            | 323 K                            |
|--------------------|----------------------------------|----------------------------------|----------------------------------|----------------------------------|
|                    | $(1.80 \pm 0.13) \times 10^{-4}$ | $(2.66 \pm 0.14) \times 10^{-4}$ | $(3.44 \pm 0.15) \times 10^{-4}$ | $(4.00 \pm 0.11) \times 10^{-4}$ |

**Table S2** Rate constant  $k_1$  of  $TEA^+$  at different temperatures.

| $k_1$ ( $s^{-1}$ ) | 303 K                            | 308 K                            | 313 K                            | 318 K                            | 323 K                            |
|--------------------|----------------------------------|----------------------------------|----------------------------------|----------------------------------|----------------------------------|
| $TEA^+$            | $(3.66 \pm 0.16) \times 10^{-6}$ | $(5.15 \pm 0.28) \times 10^{-6}$ | $(6.54 \pm 0.20) \times 10^{-6}$ | $(1.04 \pm 0.03) \times 10^{-5}$ | $(1.58 \pm 0.07) \times 10^{-5}$ |

**Table S3** Rate constant  $k_1$  of  $TMA^+$  at different temperatures.

| $k_1$ ( $s^{-1}$ ) | 273 K                            | 283 K                            | 293 K                            | 313 K                            |
|--------------------|----------------------------------|----------------------------------|----------------------------------|----------------------------------|
| $TMA^+$            | $(3.79 \pm 0.25) \times 10^{-6}$ | $(8.48 \pm 0.41) \times 10^{-6}$ | $(1.33 \pm 0.14) \times 10^{-5}$ | $(4.44 \pm 0.20) \times 10^{-5}$ |

**Table S4** Rate constant  $k_1$  of  $\text{Ch}^+$  at different temperatures.

| $k_1$ ( $\text{s}^{-1}$ ) | 273 K                            | 283 K                            | 293 K                            | 313 K                            |
|---------------------------|----------------------------------|----------------------------------|----------------------------------|----------------------------------|
| $\text{Ch}^+$             | $(6.81 \pm 0.44) \times 10^{-6}$ | $(2.00 \pm 0.11) \times 10^{-5}$ | $(2.49 \pm 0.17) \times 10^{-5}$ | $(4.06 \pm 0.29) \times 10^{-5}$ |

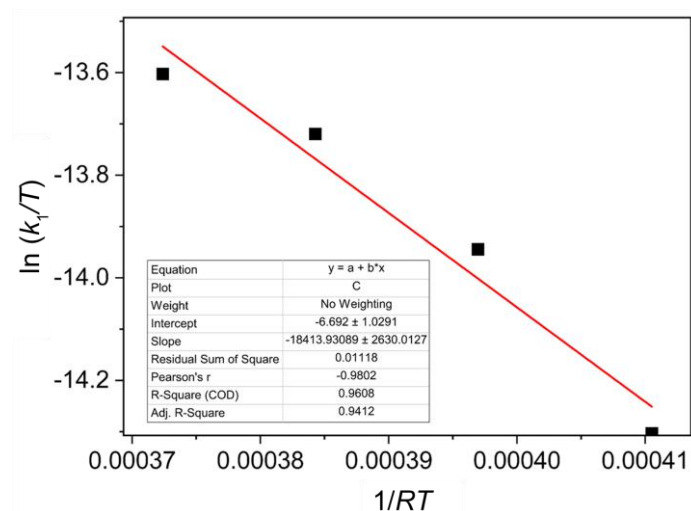**Fig. S24** Eyring plots of  $\ln(k_1/T)$  versus  $1/RT$  for the determination of the activation enthalpy ( $\Delta H^\ddagger$ ) and entropy ( $\Delta S^\ddagger$ ) for chiral induction of 12 equiv of  $\text{G}^{2R}$ .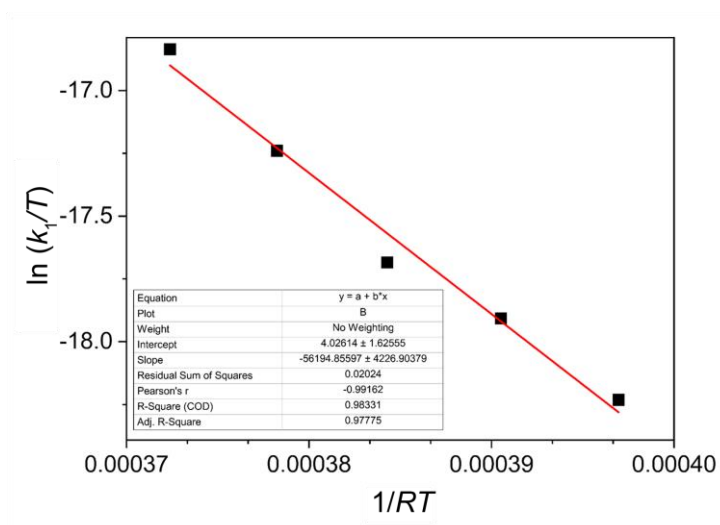**Fig. S25** Eyring plots of  $\ln(k_1/T)$  versus  $1/RT$  for the determination of the activation enthalpy ( $\Delta H^\ddagger$ ) and entropy ( $\Delta S^\ddagger$ ) for racemization of  $1 \rightarrow \text{TEA}^+$ .

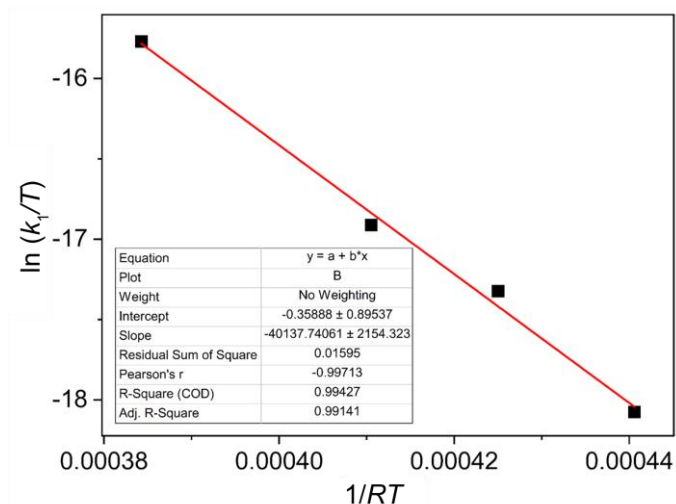

**Fig. S26** Eyring plots of  $\ln(k_1/T)$  versus  $1/RT$  for the determination of the activation enthalpy ( $\Delta H^\ddagger$ ) and entropy ( $\Delta S^\ddagger$ ) for racemization of  $1\text{D-TMA}^+$ .

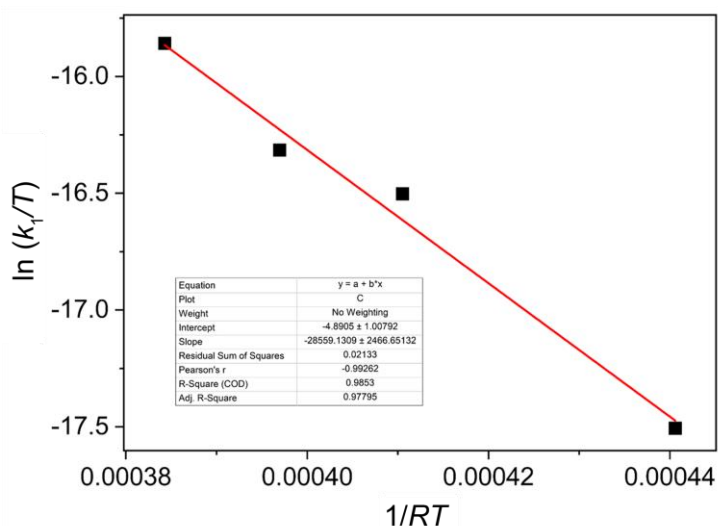

**Fig. S27** Eyring plots of  $\ln(k_1/T)$  versus  $1/RT$  for the determination of the activation enthalpy ( $\Delta H^\ddagger$ ) and entropy ( $\Delta S^\ddagger$ ) for racemization of  $1\text{D-Ch}^+$ .

## S5. Binding constant

The binding constants were determined by  $^1\text{H}$  NMR titrations<sup>6</sup> (in 1 : 1 model). All  $^1\text{H}$  NMR titrations were performed at room temperature. In the titrations the guest was added to a 500  $\mu\text{L}$  of cage with 1,3,5-trimethoxybenzene (0.5 mM) as internal standard in  $\text{CD}_3\text{CN}$ .

The equilibrium between a host  $H$  and a guest  $G$  that can form host-guest complex  $HG$ :

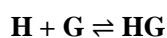

Binding constant  $K$  for this equilibrium is defined as:

$$K = \frac{[HG]}{[H][G]}$$

Using origin to fit the binding data,

$$Y=Y_0+DY*((K_a*(P+x)+1)-\text{SQRT}(((K_a*(P+x)+1)^2-4*K_a*K_a*P*x)))/(2*K_a*P)$$

Y Measured Integral Area

Y<sub>0</sub> Integral Area of empty host solution

DY Maximal change in Integral Area: the difference in Integral Area of a fully occupied host and an empty host

K<sub>a</sub> Binding constant

P Total host concentration

x Total guest concentration

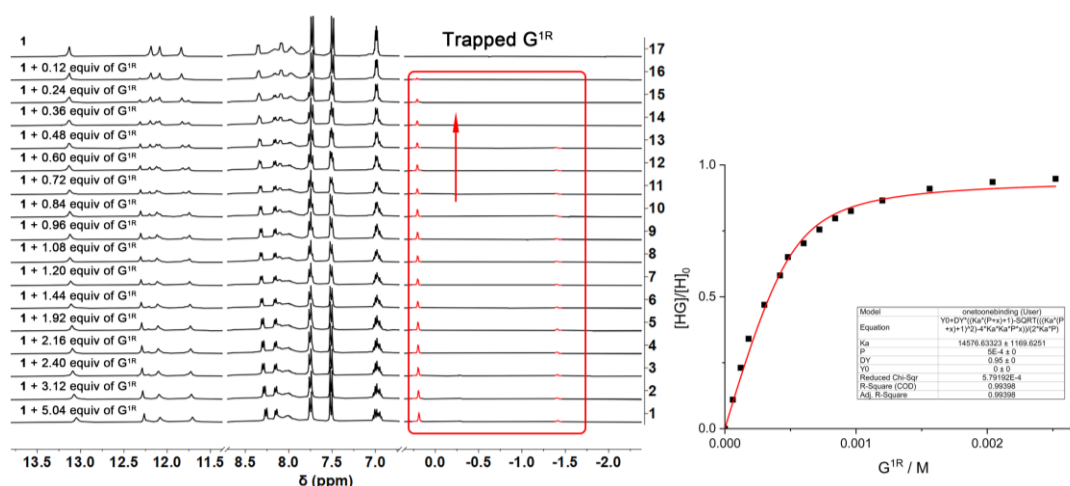

**Fig. S28** Partial <sup>1</sup>H NMR spectra (400 MHz, 298 K, CD<sub>3</sub>CN) of **1** (0.5 mM, both **1** and guest were corrected by 1,3,5-trimethoxybenzene) upon addition of 0-5.04 equiv of G<sup>1R</sup> (the signals for **1**⊃G<sup>1R</sup> are shown in red, left), and data fitting for the titration of the slow exchange G<sup>1R</sup> guest into a solution of **1** (right). A binding constant of  $(1.46 \pm 0.12) \times 10^4 \text{ M}^{-1}$  was calculated for **1**⊃G<sup>1R</sup>.

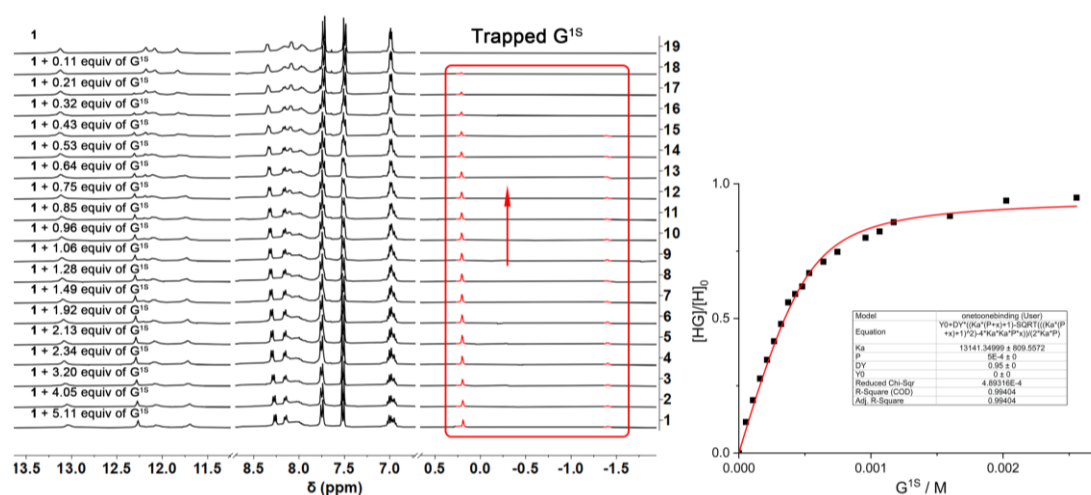

**Fig. S29** Partial <sup>1</sup>H NMR spectra (400 MHz, 298 K, CD<sub>3</sub>CN) of **1** (0.5 mM, both **1** and guest were corrected by 1,3,5-trimethoxybenzene) upon addition of 0-5.11 equiv of G<sup>1S</sup> (the signals for **1**⊃G<sup>1S</sup> are shown in red, left), and data fitting for the titration of the slow exchange G<sup>1S</sup> guest into a solution of **1** (right). A binding constant of  $(1.31 \pm 0.08) \times 10^4 \text{ M}^{-1}$  was calculated for **1**⊃G<sup>1S</sup>.



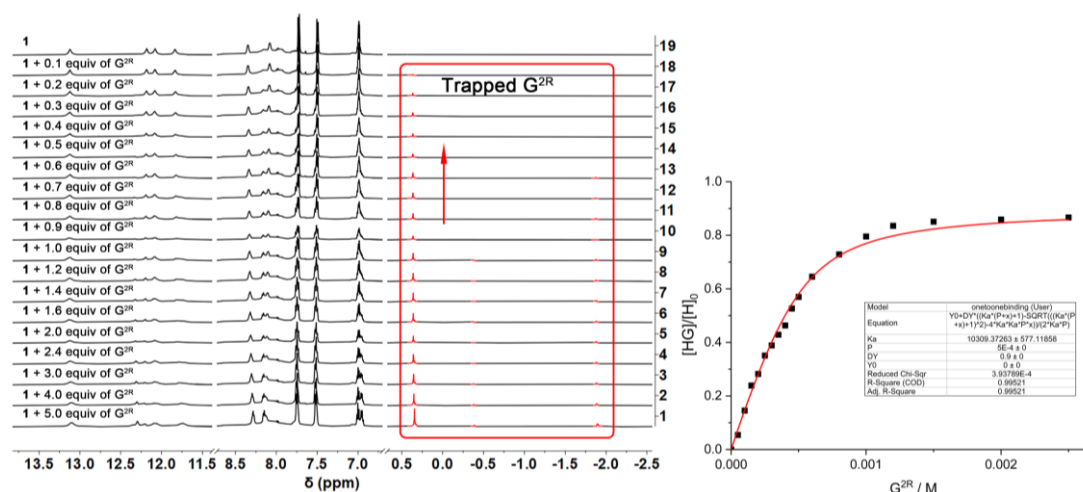

**Fig. S30** Partial  $^1\text{H}$  NMR spectra (400 MHz, 298 K,  $\text{CD}_3\text{CN}$ ) of **1** (0.5 mM, both **1** and guest were corrected by 1,3,5-trimethoxybenzene) upon addition of 0-5.0 equiv of  $\text{G}^{2\text{R}}$  (the signals for  $\mathbf{1} \supset \text{G}^{2\text{R}}$  are shown in red, left), and data fitting for the titration of the slow exchange  $\text{G}^{2\text{R}}$  guest into a solution of **1** (right). A binding constant of  $(1.03 \pm 0.06) \times 10^4 \text{ M}^{-1}$  was calculated for  $\mathbf{1} \supset \text{G}^{2\text{R}}$ .

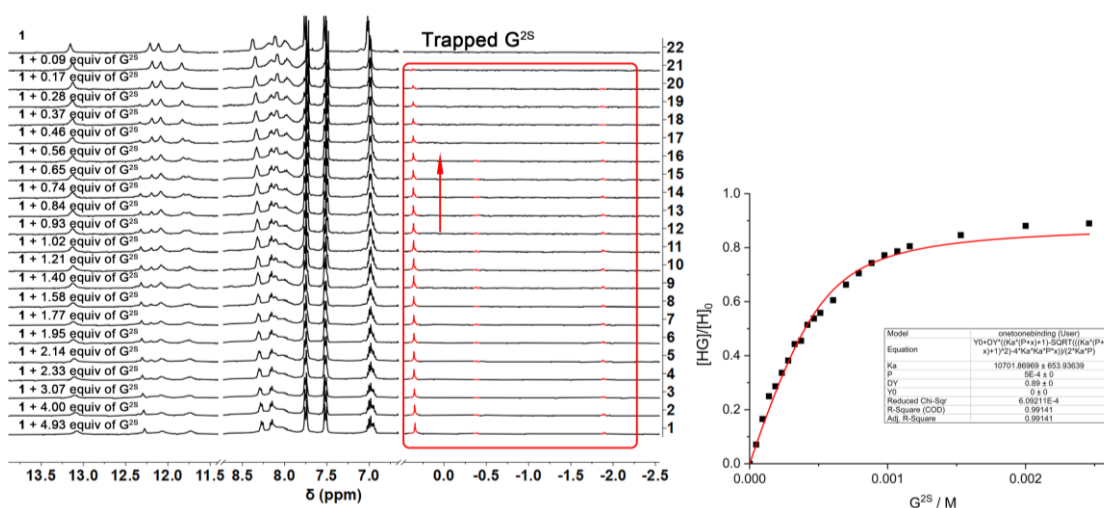

**Fig. S31** Partial  $^1\text{H}$  NMR spectra (400 MHz, 298 K,  $\text{CD}_3\text{CN}$ ) of **1** (0.5 mM, both **1** and guest were corrected by 1,3,5-trimethoxybenzene) upon addition of 0-4.93 equiv of  $\text{G}^{2\text{S}}$  (the signals for  $\mathbf{1} \supset \text{G}^{2\text{S}}$  are shown in red, left), and data fitting for the titration of the slow exchange  $\text{G}^{2\text{S}}$  guest into a solution of **1** (right). A binding constant of  $(1.07 \pm 0.06) \times 10^4 \text{ M}^{-1}$  was calculated for  $\mathbf{1} \supset \text{G}^{2\text{S}}$ .

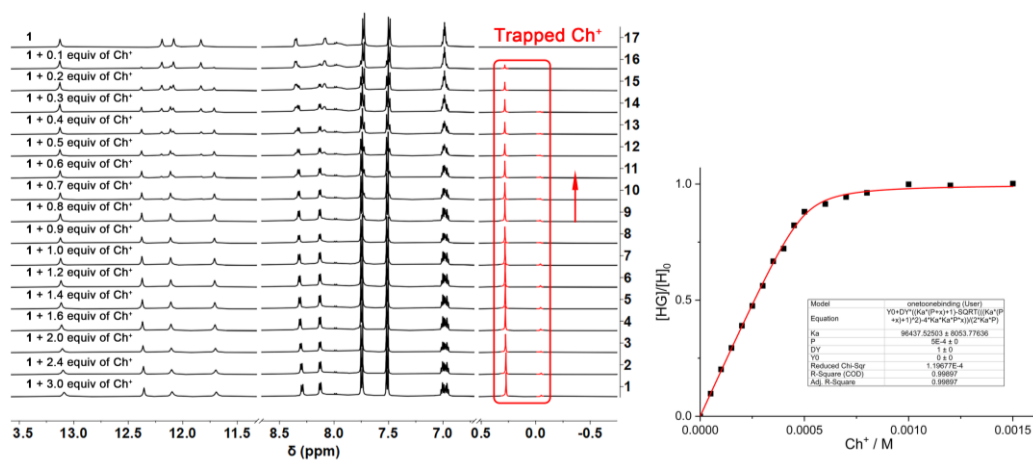

**Fig. S32** Partial  $^1\text{H}$  NMR spectra (400 MHz, 298 K,  $\text{CD}_3\text{CN}$ ) of **1** (0.5 mM, both **1** and guest were corrected by 1,3,5-trimethoxybenzene) upon addition of 0-3.0 equiv of  $\text{Ch}^+$  (the signals for  $\mathbf{1} \supset \text{Ch}^+$  are shown in red, left), and data fitting for the titration of the slow exchange  $\text{Ch}^+$  guest into a solution of **1** (right). A binding constant of  $(9.64 \pm 0.80) \times 10^4 \text{ M}^{-1}$  was calculated for  $\mathbf{1} \supset \text{Ch}^+$ .

## S6. High-resolution ESI-MS spectra

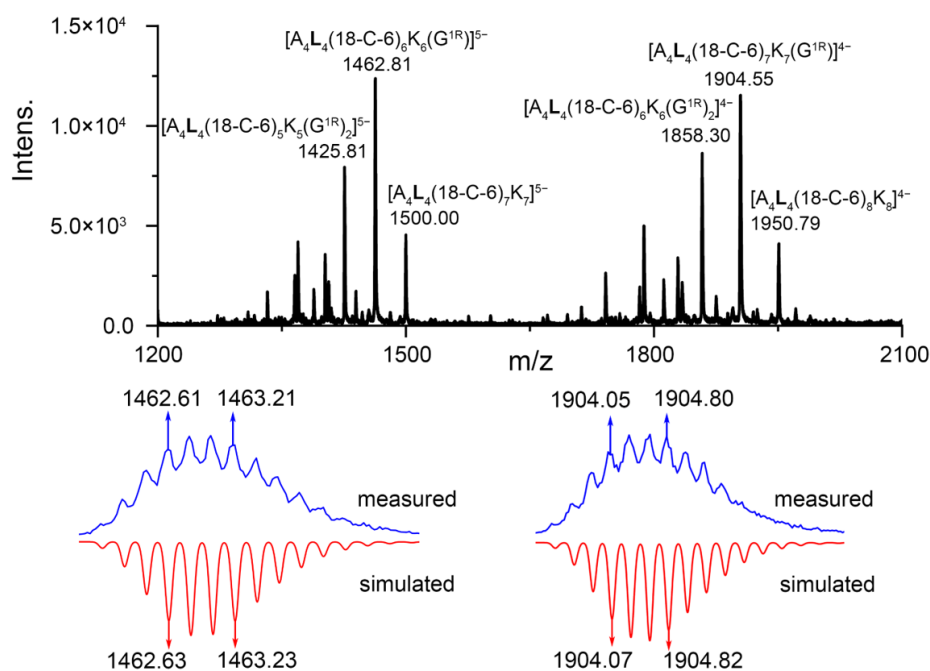

**Fig. S33** High-resolution ESI-mass spectrum of  $\mathbf{1} \supset \text{G}^{1\text{R}}$ .

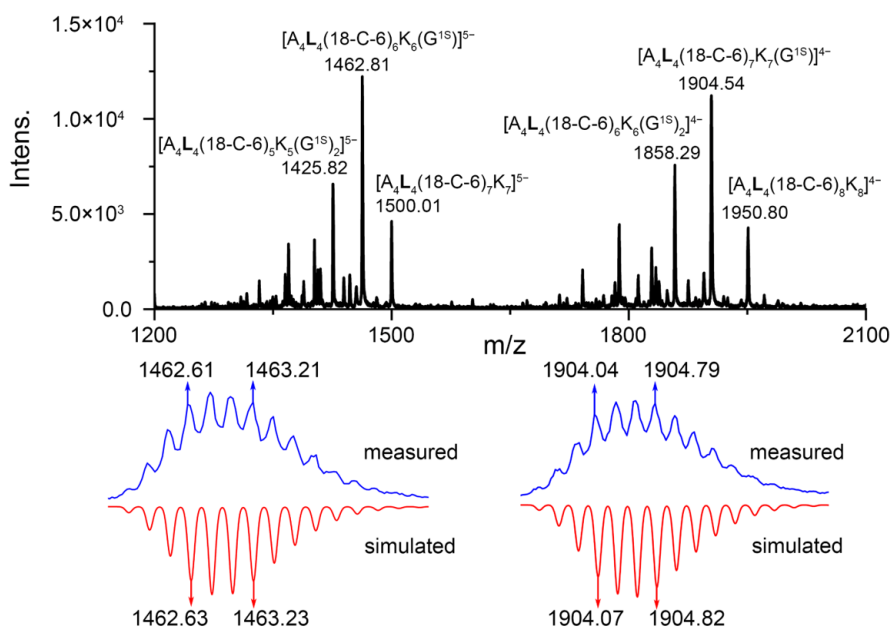

**Fig. S34** High-resolution ESI-mass spectrum of  $1D G^{1S}$ .

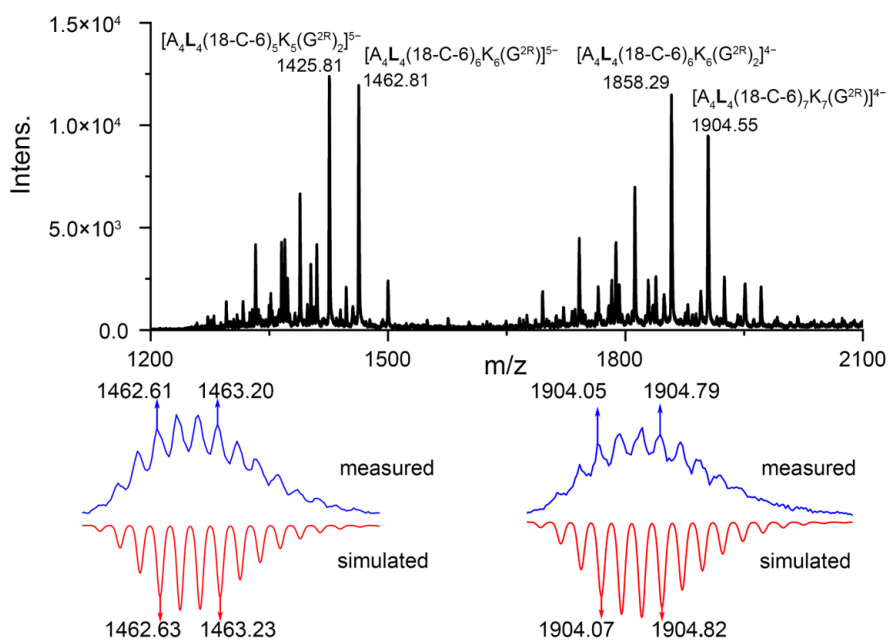

**Fig. S35** High-resolution ESI-mass spectrum of  $1D G^{2R}$ .

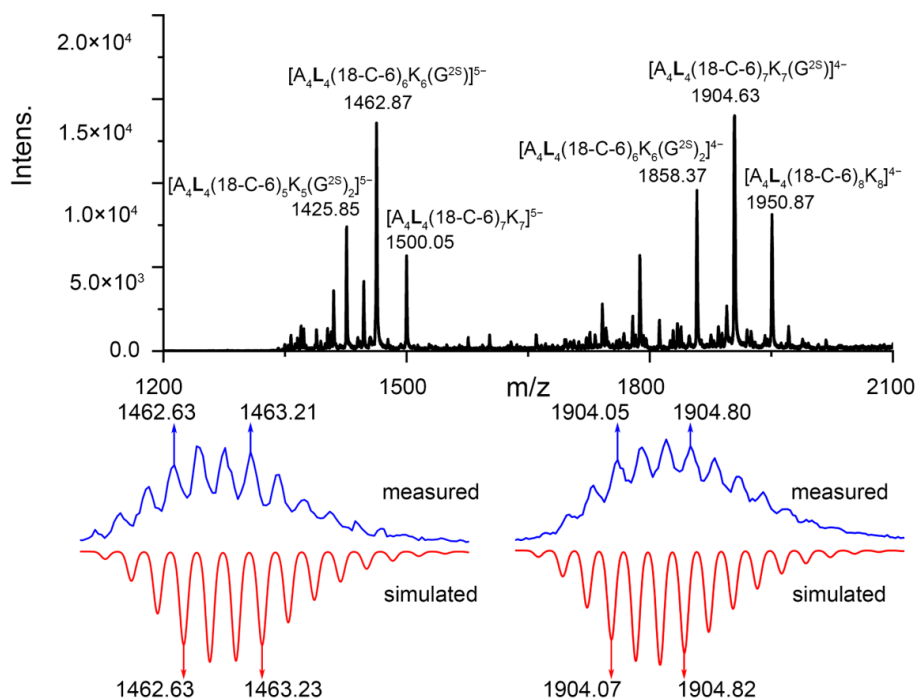

**Fig. S36** High-resolution ESI-mass spectrum of  $1\text{D}G^{2S}$ .

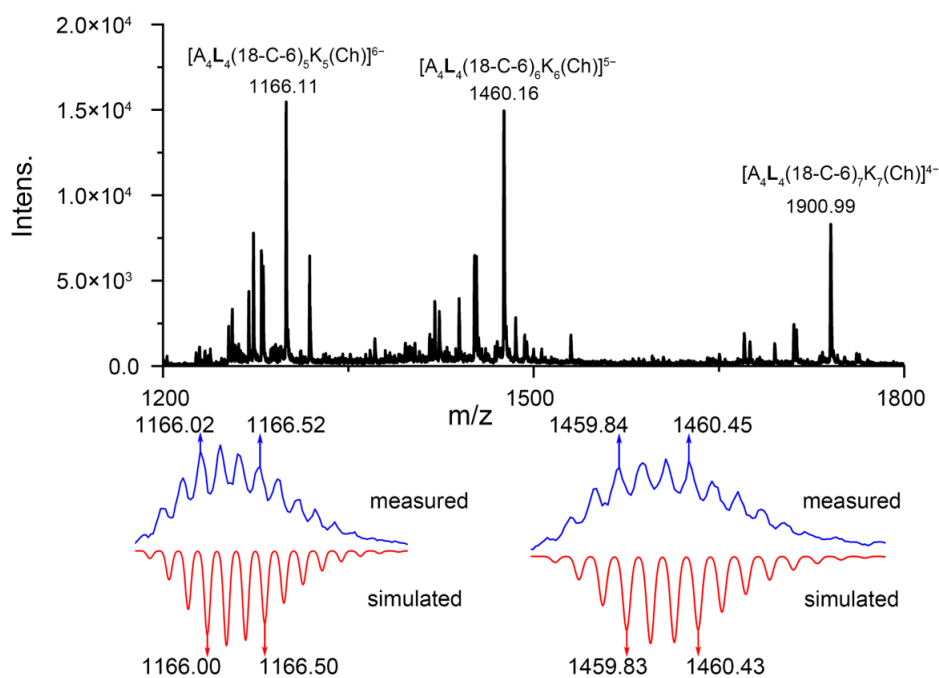

**Fig. S37** High-resolution ESI-mass spectrum of  $1\text{D}Ch^+$ .

## S7. Energy calculations

The semi-empirical calculations for  $\Delta\Delta\Delta\Delta-1\text{D}G^{2R}$  and  $\Lambda\Lambda\Lambda\Lambda-1\text{D}G^{2R}$  are optimized by using the PM6 Hamiltonian<sup>7</sup>, augmented with empirical dispersion correction (D3)<sup>8</sup>. Based on the optimized geometries, energies were corrected with acetonitrile using the polarizable continuum model (PCM).<sup>9</sup> DFT calculations are also optimized on PM6 optimizations at B3LYP/6-31G level by Gaussian 16 program.<sup>10</sup>

**Table S5** The energies of  $\Delta\Delta\Delta\Delta-1\text{D}G^{2R}$  and  $\Lambda\Lambda\Lambda\Lambda-1\text{D}G^{2R}$ .

| unit (kcal mol <sup>-1</sup> ) |                       | $\Delta E$ |
|--------------------------------|-----------------------|------------|
| PM6                            | Gas phase             | 8.64       |
|                                | Acetonitrile solution | 2.53       |
| DFT<br>B3LYP/6-31G             | Gas phase             | 10.56      |

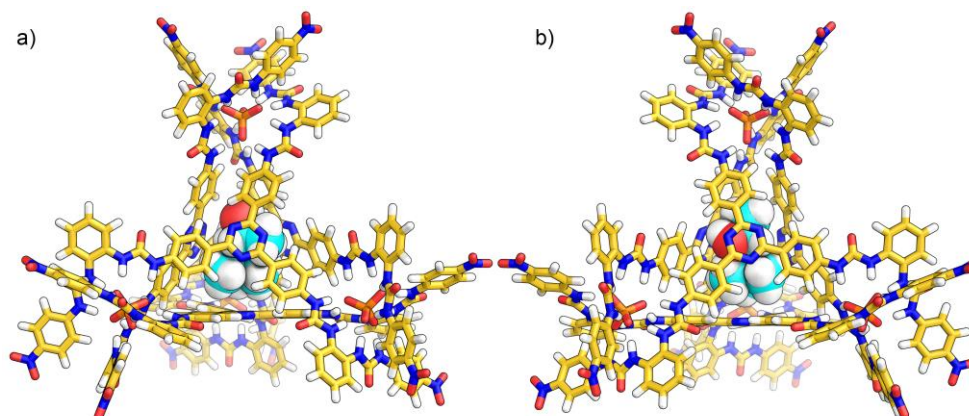

**Fig. S38** Optimized structure at PM6 level after corrected with acetonitrile. a)  $\Delta\Delta\Delta\Delta-1\text{D}G^{2R}$  and b)  $\Lambda\Lambda\Lambda\Lambda-1\text{D}G^{2R}$ .

## S8. X-ray crystallography

The diffraction data for  $1\text{D}G^{1R}$  was collected on a Bruker D8 Venture photon II diffractometer at 150 K with graphite-monochromated Cu-K radiation ( $\lambda = 1.54178 \text{ \AA}$ ). The diffraction data for  $1\text{D}G^{2R}$  was collected at the BL17B macromolecular crystallography beamline in Shanghai Synchrotron Facility. The collected diffraction data were processed with the KHL3000 software program.<sup>11</sup> An empirical absorption correction using SADABS was applied for the data. The structures were solved by the direct method using the SHELXT program. All non-hydrogen atoms were refined anisotropically by full-matrix least-squares on  $F^2$  by the use of the SHELXL program. Hydrogen atoms bonded to carbon and nitrogen atoms were included in idealized geometric positions with thermal parameters equivalent to 1.2 times those of the atom to which they were attached.

The remaining solvents could not be successfully resolved despite numerous attempts at modeling, and consequently the SQUEEZE function of PLATON was used to account for these highly disordered solvents.

The removed void electron density corresponds to about 0.7 water molecules for  $1\text{D}G^{1R}$ . In addition, one TBA<sup>+</sup> was refined with restraints. And due to the weak diffractions at higher angles the structure of guest trapped was restrained.

The removed void electron density corresponds to about 19.7 water molecules for  $1\text{D}G^{2R}$ . In addition, five TBA<sup>+</sup>, three [K([18]crown-6)]<sup>+</sup> two nitro groups and eight benzene rings were refined with restraints. And due to the weak diffractions at higher angles the structure of guest trapped was restrained.

CCDC 2242757-2242758 contain the supplementary crystallographic data for this paper. These data can be obtained free of charge from The Cambridge Crystallographic Data Centre via [www.ccdc.cam.ac.uk/data\\_request/cif](http://www.ccdc.cam.ac.uk/data_request/cif).

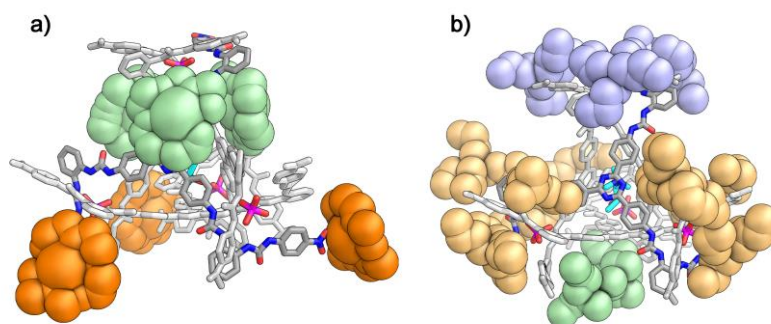

**Fig. S39** a) Peripheral  $[K([18]crown-6)]^+$ , b) peripheral  $TBA^+$  in  $1\supset G^{2R}$ .

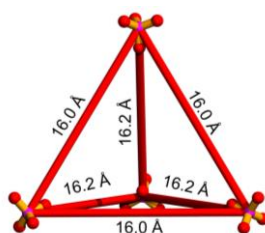

**Fig. S40** The  $PO_4^{3-}\cdots PO_4^{3-}$  distances in  $1\supset G^{2R}$ .

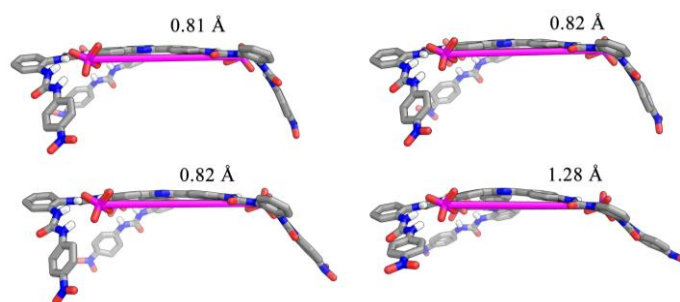

**Fig. S41** The distances between the triazine plane and the triangular face of the tetrahedron.

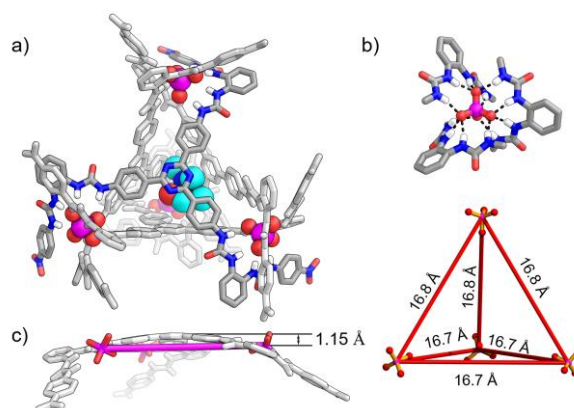

**Fig. S42** a) X-ray single-crystal structure of  $(TBA)_{11}[(PO_4)_4L_4\supset G^{1R}]$  ( $1\supset G^{1R}$ ), b) hydrogen bonding between urea groups and  $PO_4^{3-}$ , c) the longer distance between the triazine plane and the triangular face of the tetrahedron, d)  $PO_4^{3-}\cdots PO_4^{3-}$  distances in  $1\supset G^{1R}$ .

**Table S6** Crystal data of **1D**G<sup>1R</sup>, **1D**G<sup>2R</sup>.

|                                   | <b>1D</b> G <sup>1R</sup>                                                          | <b>1D</b> G <sup>2R</sup>                                                                         |
|-----------------------------------|------------------------------------------------------------------------------------|---------------------------------------------------------------------------------------------------|
| Empirical formula                 | C <sub>876</sub> H <sub>816</sub> N <sub>173</sub> O <sub>134</sub> P <sub>8</sub> | C <sub>735</sub> H <sub>598</sub> K <sub>7</sub> N <sub>161</sub> O <sub>172</sub> P <sub>8</sub> |
| Formula weight                    | 16158.73                                                                           | 14959.17                                                                                          |
| Crystal System                    | Trigonal                                                                           | Monoclinic                                                                                        |
| Space group                       | <i>R</i> -3c                                                                       | <i>C</i> 2/c                                                                                      |
| a (Å)                             | 39.1474(5)                                                                         | 65.04(3)                                                                                          |
| b (Å)                             | 39.1474(5)                                                                         | 37.519(16)                                                                                        |
| c (Å)                             | 111.4756(16)                                                                       | 41.93(3)                                                                                          |
| α (deg)                           | 90                                                                                 | 90                                                                                                |
| β (deg)                           | 90                                                                                 | 121.08(2)                                                                                         |
| γ (deg)                           | 120                                                                                | 90                                                                                                |
| V (Å <sup>3</sup> )               | 147950(4)                                                                          | 87633(85)                                                                                         |
| Z                                 | 6                                                                                  | 4                                                                                                 |
| Dcalc, g/cm <sup>3</sup>          | 1.088                                                                              | 1.134                                                                                             |
| No. of unique data                | 29003                                                                              | 68161                                                                                             |
| T (K)                             | 150.01                                                                             | 150                                                                                               |
| Total no. of data                 | 521084                                                                             | 454525                                                                                            |
| Crystal size (mm)                 | 0.21 × 0.18 × 0.13                                                                 | 0.25 × 0.20 × 0.18                                                                                |
| θ range                           | 2.257 – 66.607                                                                     | 0.732 – 24.110                                                                                    |
| Completeness to θ                 | 99.7                                                                               | 97.8                                                                                              |
| Goodness-of-fit on F <sup>2</sup> | 1.068                                                                              | 0.913                                                                                             |
| R1                                | 0.1115                                                                             | 0.1498                                                                                            |
| wR2                               | 0.3165                                                                             | 0.3706                                                                                            |

\*  $R1 = \frac{\sum ||F_o| - |F_c||}{\sum |F_o|}$  for  $F_o > 2\sigma(F_o)$ ;  $wR2 = \left( \frac{\sum w(F_o - F_c)^2}{\sum (wF_c^2)} \right)^{1/2}$  all reflections  $w = 1 / \left[ \sigma^2(F_o^2) + (0.2000P)^2 \right]$

where  $P = (F_o^2 + 2F_c^2) / 3$ .

**Table S7** Hydrogen bonds around the PO<sub>4</sub><sup>3-</sup> ions in **1D**G<sup>1R</sup>.

|            | D–H⋯A      | d(D–H)     | d(H⋯A) | d(D⋯A)     | ∠(DHA)     |
|------------|------------|------------|--------|------------|------------|
| P1         | N5–H5⋯O1   | 0.88       | 1.93   | 2.787(2)   | 165        |
|            | N21–H21⋯O1 | 0.88       | 1.90   | 2.753(3)   | 163        |
|            | N22–H22⋯O1 | 0.88       | 1.93   | 2.790(3)   | 165        |
|            | N16–H16⋯O2 | 0.88       | 1.97   | 2.788(2)   | 154        |
|            | N17–H17⋯O2 | 0.88       | 1.91   | 2.770(3)   | 166        |
|            | N23–H23⋯O2 | 0.88       | 1.93   | 2.798(3)   | 169        |
|            | N3–H3⋯O3   | 0.88       | 1.95   | 2.803(3)   | 164        |
|            | N4–H4⋯O3   | 0.88       | 1.91   | 2.777(3)   | 168        |
|            | N18–H18⋯O3 | 0.88       | 1.91   | 2.749(3)   | 158        |
|            | N2–H2⋯O4   | 0.88       | 2.17   | 2.923(3)   | 144        |
|            | N15–H15⋯O4 | 0.88       | 2.14   | 2.9537(16) | 153        |
|            | N20–H20⋯O4 | 0.88       | 2.24   | 3.009(3)   | 146        |
|            | P2         | N10–H10⋯O5 | 0.88   | 2.23       | 2.9693(18) |
| N11–H11⋯O6 |            | 0.88       | 1.87   | 2.727(2)   | 166        |
| N12–H12⋯O6 |            | 0.88       | 2.02   | 2.875(3)   | 164        |
| N13–H13⋯O6 |            | 0.88       | 1.98   | 2.840(2)   | 167        |

**Table S8** Hydrogen bonds around the PO<sub>4</sub><sup>3-</sup> ions in 1>G<sup>2R</sup>.

|                | D-H...A        | d(D-H)        | d(H...A) | d(D...A) | ∠(DHA)   |
|----------------|----------------|---------------|----------|----------|----------|
| P1             | N7-H7...O1     | 0.86          | 1.85     | 2.694(3) | 166      |
|                | N41-H41...O1   | 0.86          | 1.88     | 2.692(3) | 156      |
|                | N42-H42...O1   | 0.86          | 1.84     | 2.682(3) | 167      |
|                | N43-H43...O2   | 0.86          | 1.84     | 2.662(3) | 160      |
|                | N69-H69A...O2  | 0.86          | 1.85     | 2.687(3) | 164      |
|                | N70-H70...O2   | 0.86          | 1.86     | 2.690(3) | 163      |
|                | N5-H5...O3     | 0.86          | 1.80     | 2.638(3) | 164      |
|                | N6-H6...O3     | 0.86          | 1.83     | 2.675(3) | 169      |
|                | N71-H71A...O3  | 0.86          | 1.81     | 2.647(3) | 165      |
|                | N4-H4...O4     | 0.86          | 2.20     | 2.931(3) | 143      |
|                | N40-H40...O4   | 0.86          | 2.00     | 2.778(3) | 150      |
|                | N68-H68A...O4  | 0.86          | 2.04     | 2.804(3) | 148      |
|                | P2             | N14-H14...O5  | 0.86     | 2.06     | 2.840(3) |
| N22-H22...O5   |                | 0.86          | 2.08     | 2.850(3) | 149      |
| N50-H50...O5   |                | 0.86          | 2.06     | 2.826(3) | 147      |
| N17-H17...O6   |                | 0.86          | 1.89     | 2.688(3) | 155      |
| N23-H23...O6   |                | 0.86          | 1.80     | 2.628(3) | 162      |
| N24-H24...O6   |                | 0.86          | 1.83     | 2.674(3) | 169      |
| N25-H25...O7   |                | 0.86          | 1.89     | 2.685(3) | 153      |
| N51-H51...O7   |                | 0.86          | 1.80     | 2.641(3) | 166      |
| N52-H52...O7   |                | 0.86          | 1.85     | 2.693(3) | 167      |
| N15-H15...O8   |                | 0.86          | 1.81     | 2.636(3) | 162      |
| N16-H16...O8   |                | 0.86          | 1.85     | 2.689(3) | 166      |
| N53-H53...O8   |                | 0.86          | 1.89     | 2.690(3) | 154      |
| P3             |                | N28-H28...O9  | 0.86     | 1.86     | 2.684(3) |
|                | N29-H29...O9   | 0.86          | 1.82     | 2.667(3) | 167      |
|                | N48-H48...O9   | 0.86          | 1.89     | 2.727(3) | 165      |
|                | N27-H27...O10  | 0.86          | 2.03     | 2.800(3) | 149      |
|                | N45-H45...O10  | 0.86          | 2.13     | 2.889(3) | 147      |
|                | N63-H63A...O10 | 0.86          | 2.04     | 2.788(3) | 145      |
|                | N30-H30...O11  | 0.86          | 1.86     | 2.633(3) | 149      |
|                | N64-H64...O11  | 0.86          | 1.84     | 2.678(3) | 163      |
|                | N65-H65...O11  | 0.86          | 1.85     | 2.696(3) | 166      |
|                | N46-H46...O12  | 0.86          | 1.81     | 2.638(3) | 162      |
|                | N47-H47...O12  | 0.86          | 1.84     | 2.686(3) | 168      |
|                | N66-H66...O12  | 0.86          | 1.82     | 2.651(3) | 163      |
|                | P4             | N12-H12...O13 | 0.86     | 1.85     | 2.671(3) |
| N59-H59A...O13 |                | 0.86          | 1.85     | 2.675(3) | 161      |
| N60-H60A...O13 |                | 0.86          | 1.85     | 2.694(3) | 165      |
| N10-H10...O14  |                | 0.86          | 1.90     | 2.698(3) | 154      |
| N11-H11...O14  |                | 0.86          | 1.84     | 2.686(3) | 166      |
| N35-H35...O14  |                | 0.86          | 1.86     | 2.705(3) | 168      |
| N9-H9...O15    |                | 0.86          | 2.03     | 2.804(3) | 149      |
| N32-H32...O15  |                | 0.86          | 2.16     | 2.910(3) | 146      |
| N58-H58...O15  |                | 0.86          | 2.04     | 2.790(3) | 146      |
| N33-H33...O16  |                | 0.86          | 1.78     | 2.611(3) | 163      |
| N34-H34...O16  |                | 0.86          | 1.83     | 2.674(3) | 167      |
| N61-H61...O16  |                | 0.86          | 1.81     | 2.643(3) | 161      |

## S9. References

- 1 W. Zhang, D. Yang, J. Zhao, L. Hou, J. L. Sessler, X.-J. Yang and B. Wu, *J. Am. Chem. Soc.*, 2018, **140**, 5248-5256.
- 2 B. Li, B. Zheng, W. Zhang, D. Zhang, X.-J. Yang and B. Wu, *J. Am. Chem. Soc.*, 2020, **142**, 6304-6311.
- 3 T. Ishi-i, M. Crego-Calama, P. Timmerman, D. N. Reinhoudt and S. Shinkai, *J. Am. Chem. Soc.*, 2002, **124**, 14631-14641.
- 4 J.-T. Li, L.-X. Wang, D.-X. Wang, L. Zhao and M.-X. Wang, *J. Org. Chem.*, 2014, **79**, 2178-2188.
- 5 Y. Wang, H. Fang, W. Zhang, Y. Zhuang, Z. Tian and X. Cao, *Chem. Commun.*, 2017, **53**, 8956-8959.
- 6 Y. R. Hristova, M. M. J. Smulders, J. K. Clegg, B. Breiner and J. R. Nitschke, *Chem. Sci.*, 2011, **2**, 638-641.
- 7 J. J. P. Stewart, *J. Mol. Model.*, 2007, **13**, 1173-1213.
- 8 S. Grimme, J. Antony, S. Ehrlich and H. Krieg, *J. Chem. Phys.*, 2010, **132**, 154104.
- 9 J. Tomasi, B. Mennucci and R. Cammi, *Chem. Rev.*, 2005, **105**, 2999-3094.
- 10 M. J. Frisch, G. W. Trucks, H. B. Schlegel, G. E. Scuseria, M. A. Robb, J. R. Cheeseman, G. Scalmani, V. Barone, G. A. Peters-son, H. Nakatsuji, X. Li, M. Caricato, A. V. Marenich, J. Bloino, B. G. Janesko, R. Gomperts, B. Mennucci, H. P. Hratchian, J. V. Ortiz, A. F. Izmaylov, J. L. Sonnenberg, D. Williams-Young, F. Ding, F. Lipparini, F. Egidi, J. Goings, B. Peng, A. Petrone, T. Henderson, D. Ranasinghe, V. G. Zakrzewski, J. Gao, N. Rega, G. Zheng, W. Liang, M. Hada, M. Ehara, K. Toyota, R. Fukuda, J. Hasegawa, M. Ishida, T. Nakajima, Y. Honda, O. Kitao, H. Nakai, T. Vreven, K. Throssell, J. A. Montgomery, Jr., J. E. Peralta, F. Ogliaro, M. J. Bearpark, J. J. Heyd, E. N. Brothers, K. N. Kudin, V. N. Staroverov, T. A. Keith, R. Kobayashi, J. Normand, K. Raghavachari, A. P.



Rendell, J. C. Burant, S. S. Iyengar, J. Tomasi, M. Cossi, J. M. Millam, M. Klene, C. Adamo, R. Cammi, J. W. Ochterski, R. L. Martin, K. Morokuma, O. Farkas, J. B. Foresman, and D. J. Fox, *Gaussian, Inc.*, Wallingford CT., 2016.

11 Z. Otwinowski and W. Minor, *Methods Enzymol.*, 1997, **276**, 307-326.
